# Supplementary material
Source: HighWire-hosted journal article supplement (https://erj.ersjournals.com/content/51/3/1701885)
Supplement: inline-supplementary-material-1 [file inline-supplementary-material-1.pdf]

# **Biomarkers of carcinogenesis and tumour growth in patients with cutaneous melanoma and obstructive sleep apnea**

**Authors:** Santamaria-Martos F <sup>1</sup>, Benítez I <sup>1</sup>, Girón C <sup>1</sup>, Barbé F <sup>1,2</sup>, Martínez-García MA <sup>3</sup>, Hernández L <sup>4</sup>, Montserrat JM <sup>5</sup>, Nagore E <sup>6</sup>, Martorell-Calatayud A <sup>7</sup>, Campos-Rodriguez F <sup>8</sup>, Corral J <sup>9</sup>, Cabriada V <sup>10</sup>, Abad J <sup>11</sup>, Mediano O <sup>12</sup>, Troncoso MF <sup>13</sup>, Cano-Pumarega I <sup>14</sup>, Fortuna Gutierrez AM <sup>15</sup>, Diaz-Cambriles T <sup>2,16</sup>, Somoza-Gonzalez M <sup>17</sup>, Almendros I <sup>2,18</sup>, Farre R <sup>2,18</sup>, Gozal D <sup>19</sup>, Sánchez-de-la-Torre M\* <sup>1,2</sup>, on the behalf of The Spanish Sleep Network.

## **Affiliations:**

<sup>1</sup>Group of Translational Research in Respiratory Medicine, Hospital Universitari Arnau de Vilanova y Santa Maria, IRB Lleida, Lleida, Spain.

<sup>2</sup>Centro de Investigación Biomédica en Red de Enfermedades Respiratorias (CIBERES), Madrid, Spain.

<sup>3</sup> Pneumology Department. Hospital Universitario y Politécnico La Fe, Valencia, Spain.

<sup>4</sup>Pneumology Department. Hospital General de Alicante

<sup>5</sup>Pneumology Department. Hospital Clinic-IDIBAPS. Barcelona

<sup>6</sup>Dermatology Department. Instituto Valenciano de Oncología

<sup>7</sup>Dermatology Department. Hospital de Manises. Valencia

<sup>8</sup>Pneumology Department. Hospital de Valme. Seville

<sup>9</sup>Pneumology Department. Hospital San Pedro de Alcantara. Cáceres

<sup>10</sup>Pneumology Department. Hospital Cruces. Bilbao

<sup>11</sup>Pneumology Department. Hospital Germans Trias i Pujol. Barcelona

<sup>12</sup>Pneumology Department. Hospital de Guadalajara.

<sup>13</sup>Pneumology Department. Fundación Jiménez Díaz. Madrid

<sup>14</sup>Pneumology Department. Hospital de Getafe. Madrid

<sup>15</sup>Pneumology Department. Hospital de la Santa Creu i Sant Pau. Barcelona

<sup>16</sup>Pneumology Department. Hospital 12 de Octubre. Madrid

<sup>17</sup>Pneumology Department. Hospital Consorci Terrassa. Barcelona

<sup>18</sup>Unitat de Biofísica i Bioenginyeria, Facultat de Medicina i Ciències de la Salut,  
Universitat de Barcelona. Spain.

<sup>19</sup>Department of Pediatrics, Pritzker School of Medicine, Biological Sciences Division,  
The University of Chicago, Chicago, IL, USA

\*Correspondence to: Manuel Sánchez-de-la-Torre, PhD, Hospital Arnau de Vilanova-Santa Maria, IRBLleida, CIBERES, Avda. Rovira Roure 80, 25198, Lleida, Spain; e-mail: [sanchezdelatorre@gmail.com](mailto:sanchezdelatorre@gmail.com)

**Table E1.** ELISA trademark and sensitivity

| <b>Biomarker</b> | <b>Sensitivity</b> | <b>Trademark</b>         |
|------------------|--------------------|--------------------------|
| VEGF             | 4.76 pg/ml         | Quansys Biosciences, USA |
| IL-8             | 1.31 pg/ml         | Quansys Biosciences, USA |
| VCAM-1           | 300 pg/ml          | RayBiotech,USA           |
| ICAM-1           | 150 pg/ml          | RayBiotech,USA           |
| MIA              | 10 pg/ml           | Boster, USA              |
| S100B            | 18.75 pg/ml        | Elabscience, USA         |
